# Supplementary material for: Lidocaine-Loaded Hyaluronic Acid Adhesive Microneedle Patch for Oral Mucosal Topical Anesthesia
Source: MDPI journal article supplement (doi:10.3390/pharmaceutics14040686), 2022-03-22
Supplement: s1 [file s1]

# Supplementary Materials: Lidocaine-Loaded Hyaluronic Acid Adhesive Microneedle Patch for Oral Mucosal Topical Anesthesia

Tingting Zhu, Xixi Yu, Xiaoli Guo, Longhao Li, Wanchun Wang, Yuanping Hao

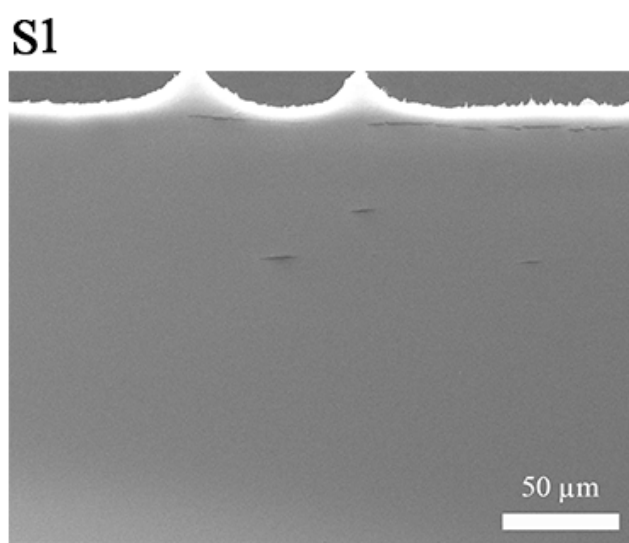

**Figure S1.** The force curve of blend film analyzed by the universal testing machine.

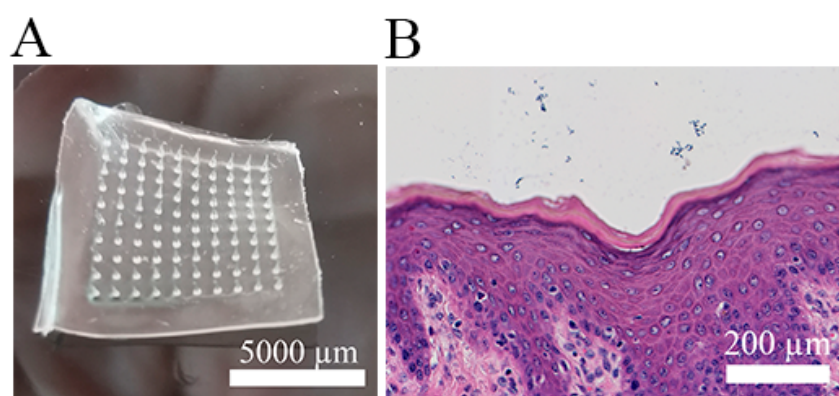

**Figure S2.** Test of Li-HAMNs after 6 months of storage. (A) The photograph of Li-HAMNs patch. Scale bar, 5000  $\mu\text{m}$ . (B) Image of H&E staining section of pig oral mucosa after the application of Li-HAMNs.
